# Supplementary material
Source: ML conference proceedings conference paper supplement (https://openreview.net/forum?id=26qqUHi9XF)
Supplement: supplementary_material [file attachment]

## A Basic facts of Tsallis KL divergence

We present some basic facts about  $q$ -logarithm and Tsallis KL divergence.

We begin by introducing the  $2 - q$  duality for Tsallis statistics. Recall that the  $q$ -logarithm and Tsallis entropy defined in the main paper are:

$$\ln_q x = \frac{x^{1-q} - 1}{1 - q}, \quad S_q(x) = -\langle x^q, \ln_q x \rangle.$$

In the RL literature, another definition  $q^* = 2 - q$  is more often used [Lee et al., 2020]. This is called the  $2 - q$  duality [Naudts, 2002, Suyari and Tsukada, 2005], which refers to that the Tsallis entropy can be equivalently defined as:

$$\ln_{q^*} x = \frac{x^{q^*-1} - 1}{q^* - 1}, \quad S_{q^*}(x) = -\langle x, \ln_{q^*} x \rangle,$$

By the duality we can show [Suyari and Tsukada, 2005, Eq.(12)]:

$$S_q(x) := -\left\langle x^q, \frac{x^{1-q} - 1}{1 - q} \right\rangle = \frac{\langle \mathbf{1}, x^q \rangle - 1}{1 - q} = \frac{\langle \mathbf{1}, x^{q^*} \rangle - 1}{1 - q^*} = -\left\langle x, \frac{x^{q^*-1} - 1}{q^* - 1} \right\rangle =: S_{q^*}(x),$$

i.e. the duality between logarithms  $\ln_{q^*} x$  and  $\ln_q x$  allows us to define Tsallis entropy by an alternative notation  $q^*$  that eventually reaches to the same functional form.

We now come to examine Tsallis KL divergence (or Tsallis relative entropy) defined in another form:  $D_{KL}^q(\pi \| \mu) = \left\langle \pi, \ln_{q^*} \frac{\pi}{\mu} \right\rangle$  [Prehl et al., 2012]. In the main paper we used the definition  $D_{KL}^q(\pi \| \mu) = \left\langle \pi, -\ln_q \frac{\mu}{\pi} \right\rangle$  [Furuichi et al., 2004]. We show they are equivalent by the same logic:

$$\left\langle \pi, -\ln_q \frac{\mu}{\pi} \right\rangle = \left\langle \pi, -\frac{\left(\frac{\mu}{\pi}\right)^{1-q} - 1}{1 - q} \right\rangle = \left\langle \pi, \frac{\left(\frac{\pi}{\mu}\right)^{q-1} - 1}{q - 1} \right\rangle = \left\langle \pi, \ln_{q^*} \frac{\pi}{\mu} \right\rangle. \quad (12)$$

The equivalence allows us to work with whichever of  $\ln_q$  and  $\ln_{q^*}$  that makes the proof easier to work out the following useful properties of Tsallis KL divergence:

— Nonnegativity  $D_{KL}^q(\pi \| \mu) \geq 0$ : since the function  $-\ln_q \pi$  is convex, by Jensen's inequality

$$\left\langle \pi, -\ln_q \frac{\mu}{\pi} \right\rangle \geq -\ln_q \left\langle \pi, \frac{\mu}{\pi} \right\rangle = 0,$$

— Conditions of  $D_{KL}^q(\pi \| \mu) = 0$ : directly from the above, in Jensen's inequality the equality holds only when  $\frac{\mu}{\pi} = 1$  almost everywhere, i.e.  $D_{KL}^q(\pi \| \mu) = 0$  implies  $\mu = \pi$  almost everywhere.

— Conditions of  $D_{KL}^q(\pi \| \mu) = \infty$ : To better align with the standard KL divergence, let us work with  $\ln_{q^*}$ , following [Cover and Thomas, 2006], let us define

$$0 \ln_{q^*} \frac{0}{0} = 0, \quad 0 \ln_{q^*} \frac{0}{\mu} = 0, \quad \pi \ln_{q^*} \frac{\pi}{0} = \infty.$$

We conclude that  $D_{KL}^q(\pi \| \mu) = \infty$  whenever  $\pi > 0$  and  $\mu = 0$ .

— Bounded entropy  $\forall q, 0 \leq S_q(\pi) \leq \ln_q |\mathcal{A}|$ : let  $\mu = \frac{1}{|\mathcal{A}|}$ , by the nonnegativity of Tsallis KL divergence:

$$D_{KL}^q(\pi \| \mu) = \left\langle \pi, -\ln_q \frac{1}{(|\mathcal{A}| \cdot \pi)} \right\rangle = \left\langle \pi, \frac{(|\mathcal{A}| \cdot \pi)^{q-1} - 1}{q - 1} \right\rangle = |\mathcal{A}|^{q-1} \left( \frac{\langle \mathbf{1}, \pi^q \rangle - 1}{q - 1} - \frac{|\mathcal{A}|^{q-1} - 1}{q - 1} \right) \geq 0.$$

Notice that  $\frac{\langle \mathbf{1}, \pi^q \rangle - 1}{q - 1} = \left\langle \pi^q, \frac{1 - \pi^{1-q}}{1 - q} \right\rangle = \langle \pi, \ln_q \pi \rangle = -S_q(\pi)$  and  $\frac{|\mathcal{A}|^{q-1} - 1}{q - 1} = \ln_q |\mathcal{A}|$ , we conclude

$$S_q(\pi) \leq \ln_q |\mathcal{A}|.$$

## B Proof of Theorem 1 and 2

We structure this section as the following three parts:

1. Tsallis entropy regularized policy has general expression for all  $q$ . Moreover,  $q$  and  $\tau$  are interchangeable for controlling the truncation (Theorem 1).
2. The policies can be expressed by  $q$ -exponential (Theorem 1).
3. We present a computable approximate threshold  $\hat{\psi}_q$  (Theorem 2).

**General expression for Tsallis entropy regularized policy.** The original definition of Tsallis entropy is  $S_{q^*}(\pi(\cdot|s)) = \frac{p}{q^*-1} (1 - \sum_a \pi^{q^*}(a|s))$ ,  $q^* \in \mathbb{R}$ ,  $p \in \mathbb{R}_+$ . Note that similar to Appendix A we can choose whichever convenient of  $q$  and  $q^*$ , since the domain of the entropic index is  $\mathbb{R}$ . To obtain the Tsallis entropy-regularized policies we follow [Chen et al., 2018]. The derivation begins with assuming an actor-critic framework where the policy network is parametrized by  $w$ . It is well-known that the parameters should be updated towards the direction specified by the policy gradient theorem:

$$\Delta w \propto \mathbb{E}_\pi \left[ Q_\pi \frac{\partial \ln \pi}{\partial w} + \tau \frac{\partial \mathcal{H}(\pi)}{\partial w} \right] - \sum_s \lambda(s) \frac{\partial \langle \mathbf{1}, \pi \rangle}{\partial w} =: f(w), \quad (13)$$

Recall that  $\mathcal{H}(\pi)$  denotes the Shannon entropy and  $\tau$  is the coefficient.  $\lambda(s)$  are the Lagrange multipliers for the constraint  $\langle \mathbf{1}, \pi \rangle = 1$ . In the Tsallis entropy framework, we replace  $\mathcal{H}(\pi)$  with  $S_{q^*}(\pi)$ . We can assume  $p = \frac{1}{q^*}$  to ease derivation, which is the case for sparsemax.

We can now explicitly write the optimal condition for the policy network parameters:

$$\begin{aligned} f(w) = 0 &= \mathbb{E}_\pi \left[ Q_\pi \frac{\partial \ln \pi}{\partial w} + \tau \frac{\partial S_{q^*}(\pi)}{\partial w} \right] - \sum_s \lambda(s) \frac{\partial \langle \mathbf{1}, \pi \rangle}{\partial w} \\ &= \mathbb{E}_\pi \left[ Q_\pi \frac{\partial \ln \pi}{\partial w} - \tau \frac{1}{q^*-1} \left\langle \mathbf{1}, \pi^{q^*} \frac{\partial \ln \pi}{\partial w} \right\rangle - \tilde{\psi}_q(s) \frac{\partial \ln \pi}{\partial w} \right] \\ &= \mathbb{E}_\pi \left[ \left( Q_\pi - \tau \frac{1}{q^*-1} \pi^{q^*-1} - \tilde{\psi}_q(s) \right) \frac{\partial \ln \pi}{\partial w} \right], \end{aligned} \quad (14)$$

where we leveraged  $\frac{\partial S_{q^*}(\pi)}{\partial w} = \frac{1}{q^*-1} \langle \mathbf{1}, \pi^{q^*} \frac{\partial \ln \pi}{\partial w} \rangle$  in the second step and absorbed terms into the expectation in the last step.  $\tilde{\psi}_q(s)$  denotes the adjusted Lagrange multipliers by taking  $\lambda(s)$  inside the expectation and modifying it according to the discounted stationary distribution.

Now it suffices to verify either  $\frac{\partial \ln \pi}{\partial w} = 0$  or

$$\begin{aligned} Q_\pi(s, a) - \tau \frac{1}{q^*-1} \pi^{q^*-1}(a|s) - \tilde{\psi}_q(s) &= 0 \\ \Leftrightarrow \pi^*(a|s) &= \sqrt[q^*-1]{\left[ \frac{Q_\pi(s, a)}{\tau} - \frac{\tilde{\psi}_q(s)}{\tau} \right]_+} (q^*-1), \\ \text{or } \pi^*(a|s) &= \sqrt[1-q]{\left[ \frac{Q_\pi(s, a)}{\tau} - \frac{\tilde{\psi}_q(s)}{\tau} \right]_+} (1-q), \end{aligned} \quad (15)$$

where we changed the entropic index from  $q^*$  to  $q$ . Clearly, the root does not affect truncation. Consider the pair  $(q^* = 50, \tau)$ , then the same truncation effect can be achieved by choosing  $(q^* = 2, \frac{\tau}{50-1})$ . The same goes for  $q$ . Therefore, we conclude that  $q$  and  $\tau$  are interchangeable for the truncation, and we should stick to the analytic choice  $q^* = 2(q = 0)$ .

**Tsallis policies can be expressed by  $q$ -exponential.** Given Eq. (15), by adding and subtracting 1, we have:

$$\pi^*(a|s) = \sqrt[1-q]{\left[ 1 + (1-q) \left( \frac{Q_\pi(s, a)}{\tau} - \tilde{\psi}_q \left( \frac{Q_\pi(s, \cdot)}{\tau} \right) - \frac{1}{1-q} \right) \right]_+} = \exp_q \left( \frac{Q_\pi(s, a)}{\tau} - \hat{\psi}_q \left( \frac{Q_\pi(s, \cdot)}{\tau} \right) \right),$$

where we defined  $\hat{\psi}_q = \tilde{\psi}_q + \frac{1}{1-q}$ . Note that this expression is general for all  $q$ , but whether  $\pi^*$  has closed-form expression depends on the solvability of  $\tilde{\psi}_q$ .

Let us consider the extreme case  $q = \infty$ . It is clear that  $\lim_{q \rightarrow \infty} \frac{1}{1-q} \rightarrow 0$ . Therefore, for any  $x > 0$  we must have  $x^{\frac{1}{1-q}} \rightarrow 1$ ; i.e., there is only one action with probability 1, with all others being 0. This conclusion agrees with the fact that  $S_q(\pi) \rightarrow 0$  as  $q \rightarrow \infty$ : hence the regularized policy degenerates to  $\arg \max$ .

**A computable Normalization Function.** The constraint  $\sum_{a \in K(s)} \pi^*(a|s) = 1$  is exploited to obtain the threshold  $\psi$  for the sparsemax [Lee et al., 2018, Chow et al., 2018]. Unfortunately, this is only possible when the root vanishes, since otherwise the constraint yields a summation of radicals. Nonetheless, we can resort to first-order Taylor expansion for deriving an approximate policy. Following [Chen et al., 2018], let us expand Eq. (15) by the first order Taylor expansion  $f(z) + f'(z)(x - z)$ , where we let  $z = 1$ ,  $x = \left[ \frac{Q_\pi(s, a)}{\tau} - \tilde{\psi}_q \left( \frac{Q_\pi(s, \cdot)}{\tau} \right) \right]_+ (1 - q)$ ,  $f(x) = x^{\frac{1}{1-q}}$ ,  $f'(x) = \frac{1}{1-q} x^{\frac{q}{1-q}}$ . So that the unnormalized approximate policy has

$$\begin{aligned} \tilde{\pi}^*(a|s) &\approx f(z) + f'(z)(x - z) \\ &= 1 + \frac{1}{1-q} \left( \left( \frac{Q_\pi(s, a)}{\tau} - \tilde{\psi}_q \left( \frac{Q_\pi(s, \cdot)}{\tau} \right) \right) (1 - q) - 1 \right). \end{aligned} \quad (16)$$

Therefore it is clear as  $q \rightarrow \infty$ ,  $\tilde{\pi}^*(a|s) \rightarrow 1$ . This concurs well with the limit case where  $\pi^*(a|s)$  degenerates to  $\arg \max$ . With Eq. (16), we can solve for the approximate normalization by the constraint  $\sum_{a \in K(s)} \pi^*(a|s) = 1$ :

$$\begin{aligned} 1 &= \sum_{a \in K(s)} \left[ 1 + \frac{1}{1-q} \left( \left( \frac{Q_\pi(s, a)}{\tau} - \tilde{\psi}_q \left( \frac{Q_\pi(s, \cdot)}{\tau} \right) \right) (1 - q) - 1 \right) \right] \\ &= |K(s)| - \frac{1}{1-q} |K(s)| + \sum_{a \in K(s)} \left[ \frac{Q_\pi(s, a)}{\tau} - \tilde{\psi}_q \left( \frac{Q_\pi(s, \cdot)}{\tau} \right) \right] \\ &\Leftrightarrow \tilde{\psi}_q \left( \frac{Q_\pi(s, \cdot)}{\tau} \right) = \frac{\sum_{a \in K(s)} \frac{Q_\pi(s, \cdot)}{\tau} - 1}{|K(s)|} + 1 - \frac{1}{1-q}. \end{aligned}$$

In order for an action to be in  $K(s)$ , it has to satisfy  $\frac{Q_\pi(s, \cdot)}{\tau} > \frac{\sum_{a \in K(s)} \frac{Q_\pi(s, \cdot)}{\tau} - 1}{|K(s)|} + 1 - \frac{1}{1-q}$ . Therefore, the condition of  $K(s)$  satisfies:

$$1 + i \frac{Q_\pi(s, a_{(i)})}{\tau} > \sum_{j=1}^i \frac{Q_\pi(s, a_{(j)})}{\tau} + i \left( 1 - \frac{1}{1-q} \right).$$

Therefore, we see the approximate threshold  $\hat{\psi}_q = \tilde{\psi}_q + 1$ . When  $q = 0$  or  $q^* = 2$ ,  $\hat{\psi}_q$  recovers  $\psi$  and hence  $\tilde{\pi}^*$  recovers the exact sparsemax policy.

## C Proof of convergence of $\Omega(\pi) = D_{KL}^q(\pi \| \cdot)$ when $q = 2$

Let us work with  $\ln_{q^*}$  from Appendix A and define  $\|\cdot\|_p$  as the  $l_p$ -norm. The convergence proof for  $\Omega(\pi) = D_{KL}^q(\pi \| \cdot)$  when  $q = 2$  comes from that  $\Omega(\pi)$  is strongly convex in  $\pi$ :

$$\Omega(\pi) = D_{KL}^{q^*=2}(\pi \| \cdot) = \left\langle \pi, \ln_2 \frac{\pi}{\cdot} \right\rangle = \left\langle \pi, \frac{\left( \frac{\pi}{\cdot} \right)^{2-1} - 1}{2-1} \right\rangle \propto \left\| \frac{\pi}{\cdot} \right\|_2^2 - 1. \quad (17)$$

Similarly, the negative Tsallis sparse entropy  $-S_2(\pi)$  is also strongly convex. Then the propositions of [Geist et al., 2019] can be applied, which we restate in the following:

**Lemma 1** ([Geist et al., 2019]). Define regularized value functions as:

$$Q_{\pi, \Omega} = r + \gamma PV_{\pi, \Omega}, \quad V_{\pi, \Omega} = \langle \pi, Q_{\pi, \Omega} \rangle - \Omega(\pi).$$

If  $\Omega(\pi)$  is strongly convex, let  $\Omega^*(Q) = \max_{\pi} \langle \pi, Q \rangle - \Omega(\pi)$  denote the Legendre-Fenchel transform of  $\Omega(\pi)$ , then

---

**Algorithm 1:** MVI( $q$ )

---

**Input:** number of iterations  $T$ , entropy coefficient  $\tau$ , TKL coefficient  $\alpha$   
Initialize  $Q_0, \pi_0$  arbitrarily  
Let  $\{|\mathcal{A}|\} = \{1, 2, \dots, |\mathcal{A}|\}$   
**for**  $k = 1, 2, \dots, T$  **do**  
  # Policy Improvement  
  **for**  $(s, a) \in (\mathcal{S}, \mathcal{A})$  **do**  
    Sort  $Q_k(s, a_{(1)}) > \dots > Q_k(s, a_{(|\mathcal{A}|)})$   
    Find  $K(s) = \max \left\{ i \in \{|\mathcal{A}|\} \mid 1 + i \frac{Q_k(s, a_{(i)})}{\tau} > \sum_{j=1}^i \frac{Q_k(s, a_{(j)})}{\tau} + i \left(1 - \frac{1}{1-q}\right) \right\}$   
    Compute  $\hat{\psi}_q \left( \frac{Q_k(s, \cdot)}{\tau} \right) = \frac{\sum_{a \in K(s)} \frac{Q_k(s, a)}{\tau} - 1}{|K(s)|} + 1$   
    # Normalize when  $q \neq 2$   
     $\pi_{k+1}(a|s) \propto \exp_q \left( \frac{Q_k(s, a)}{\tau} - \hat{\psi}_q \left( \frac{Q_k(s, \cdot)}{\tau} \right) \right)$   
  **end for**  
  # Policy Evaluation  
  **for**  $(s, a, s') \in (\mathcal{S}, \mathcal{A})$  **do**  
     $Q_{k+1}(s, a) =$   
     $r(s, a) + \alpha \tau (Q_k(s, a) - \mathcal{M}_{q, \tau} Q_k(s)) + \gamma \sum_{b \in \mathcal{A}} \pi_{k+1}(b|s') (Q_k(s', b) - \tau \ln_q \pi_{k+1}(b|s'))$   
  **end for**  
**end for**

---

- 503     •  $\nabla \Omega^*$  is Lipschitz and is the unique maximizer of  $\arg \max_{\pi} \langle \pi, Q \rangle - \Omega(\pi)$ .
- 504     •  $T_{\pi, \Omega}$  is a  $\gamma$ -contraction in the supremum norm, i.e.  $\|T_{\pi, \Omega} V_1 - T_{\pi, \Omega} V_2\|_{\infty} \leq \gamma \|V_1 - V_2\|_{\infty}$ .  
505       Further, it has a unique fixed point  $V_{\pi, \Omega}$ .
- 506     • The policy  $\pi_{*, \Omega} = \arg \max_{\pi} \langle \pi, Q_{*, \Omega} \rangle - \Omega(\pi)$  is the unique optimal regularized policy.
- 507 Note that in the main paper we dropped the subscript  $\Omega$  for both the regularized optimal policy and  
508 action value function to lighten notations. It is now clear that Eq. (6) indeed converges for entropic  
509 indices that make  $D_{KL}^q(\pi \parallel \cdot)$  strongly convex. But we mostly consider the case  $q = 2$ .

## 510 D Derivation of the Tsallis KL Policy

### 511 D.1 Tsallis KL Policies are Similar to KL

512 We extend the proof and use the same notations from [Lee et al., 2020, Appendix D] to derive  
513 the Tsallis KL regularized policy. Again let us work with  $\ln_{q^*}$  from [A]. Define state visitation as  
514  $\rho_{\pi}(s) = \mathbb{E}_{\pi} [\sum_{t=0}^{\infty} \mathbb{1}(s_t = s)]$  and state-action visitation  $\rho_{\pi}(s, a) = \mathbb{E}_{\pi} [\sum_{t=0}^{\infty} \mathbb{1}(s_t = s, a_t = a)]$ .  
515 The core of the proof resides in establishing the one-to-one correspondence between the policy and  
516 the induced state-action visitation  $\rho_{\pi}$ . For example, Tsallis entropy is written as

$$S_{q^*}(\pi) = S_{q^*}(\rho_{\pi}) = - \sum_{s, a} \rho_{\pi}(s, a) \ln_{q^*} \frac{\rho_{\pi}(s, a)}{\sum_a \rho_{\pi}(s, a)}.$$

517 This unique correspondence allows us to replace the optimization variable from  $\pi$  to  $\rho_{\pi}$ . Indeed, one  
518 can always restore the policy by  $\pi(a|s) := \frac{\rho_{\pi}(s, a)}{\sum_{a'} \rho_{\pi}(s, a')}$ .

519 Let us write Tsallis KL divergence as  $D_{KL}^{q^*}(\pi \parallel \mu) = D_{KL}^{q^*}(\rho \parallel \nu) =$   
520  $\sum_{s, a} \rho(s, a) \ln_{q^*} \frac{\rho(s, a) \sum_{a'} \nu(s, a')}{\nu(s, a) \sum_{a'} \rho(s, a')}$  by replacing the policies  $\pi, \mu$  with their state-action visita-

tion  $\rho, \nu$ . One can then convert the Tsallis MDP problem into the following problem:

$$\begin{aligned} & \max_{\rho} \sum_{s,a} \rho(s,a) \sum_{s'} r(s,a) P(s'|s,a) - D_{KL}^{q^*}(\rho \| \nu) \\ & \text{subject to } \forall s, a, \quad \rho(s,a) > 0, \\ & \sum_a \rho(s,a) = d(s) + \sum_{s',a'} P(s|s',a') \rho(s',a'), \end{aligned} \quad (18)$$

where  $d(s)$  is the initial state distribution. Eq. (18) is known as the Bellman Flow Constraints [Lee et al., 2020, Prop. 5] and is concave in  $\rho$  since the first term is linear and the second term is concave in  $\rho$ . Then the primal and dual solutions satisfy KKT conditions sufficiently and necessarily. Following [Lee et al., 2020, Appendix D.2], we define the Lagrangian objective as

$$\begin{aligned} \mathcal{L} := & \sum_{s,a} \rho(s,a) \sum_{s'} r(s,a) P(s'|s,a) - D_{KL}^{q^*}(\rho \| \nu) + \sum_{s,a} \lambda(s,a) \rho(s,a) \\ & + \sum_s \zeta(s) \left( d(s) + \sum_{s',a'} P(s|s',a') \rho(s',a') - \sum_a \rho(s,a) \right) \end{aligned}$$

where  $\lambda(s,a)$  and  $\zeta(s)$  are dual variables for nonnegativity and Bellman flow constraints. The KKT conditions are:

$$\begin{aligned} & \forall s, a, \quad \rho^*(s,a) \geq 0, \\ & d(s) + \sum_{s',a'} P(s|s',a') \rho^*(s',a') - \sum_a \rho^*(s,a) = 0, \\ & \lambda^*(s,a) \leq 0, \quad \lambda^*(s,a) \rho^*(s,a) = 0, \\ & 0 = \sum_{s'} r(s,a) P(s'|s,a) + \gamma \sum_{s'} \zeta^*(s') P(s'|s,a) - \zeta^*(s) + \lambda^*(s,a) - \frac{\partial D_{KL}^{q^*}(\rho^* \| \nu)}{\partial \rho(s,a)}, \\ & \text{where } -\frac{\partial D_{KL}^{q^*}(\rho^* \| \nu)}{\partial \rho(s,a)} = -\ln_{q^*} \frac{\rho^*(s,a) \sum_{a'} \nu(s,a')}{\nu(s,a) \sum_{a'} \rho^*(s,a')} - \left( \frac{\rho^*(s,a) \sum_{a'} \nu(s,a')}{\nu(s,a) \sum_{a'} \rho^*(s,a')} \right)^{q^*-1} \\ & \quad + \sum_a \left( \frac{\rho^*(s,a)}{\sum_{a'} \rho^*(s,a')} \right)^{q^*} \left( \frac{\sum_{a'} \nu(s,a')}{\nu(s,a)} \right)^{q^*-1}. \end{aligned}$$

The dual variable  $\zeta^*(s)$  can be shown to equal to the optimal state value function  $V^*(s)$  following [Lee et al., 2020], and  $\lambda^*(s,a) = 0$  whenever  $\rho^*(s,a) > 0$ .

By noticing that  $x^{q^*-1} = (q^* - 1) \ln_{q^*} x + 1$ , we can show that  $-\frac{\partial D_{KL}^{q^*}(\rho^* \| \nu)}{\partial \rho(s,a)} = -q^* \ln_{q^*} \frac{\rho^*(s,a) \sum_{a'} \nu(s,a')}{\nu(s,a) \sum_{a'} \rho^*(s,a')} - 1 + \sum_a \left( \frac{\rho^*(s,a)}{\sum_{a'} \rho^*(s,a')} \right)^{q^*} \left( \frac{\sum_{a'} \nu(s,a')}{\nu(s,a)} \right)^{q^*-1}$ . Substituting  $\zeta^*(s) = V^*(s)$ ,  $\pi^*(a|s) = \frac{\rho^*(s,a)}{\sum_{a'} \rho^*(s,a')}$ ,  $\mu^*(a|s) = \frac{\nu^*(s,a)}{\sum_{a'} \nu(s,a')}$  into the above KKT condition and leverage the equality  $Q^*(s,a) = r(s,a) + \mathbb{E}_{s' \sim P}[\gamma \zeta^*(s')]$  we have:

$$\begin{aligned} & Q^*(s,a) - V^*(s) - q^* \ln_{q^*} \frac{\pi(a|s)}{\mu(a|s)} - 1 + \sum_{a'} \pi(a|s) \left( \frac{\pi(a|s)}{\mu(a|s)} \right)^{q^*-1} = 0 \\ & \Leftrightarrow \pi^*(a|s) = \mu(a|s) \exp_{q^*} \left( \frac{Q^*(s,a)}{q^*} - \frac{V^*(s) + 1 - \sum_{a'} \pi(a|s) \left( \frac{\pi(a|s)}{\mu(a|s)} \right)^{q^*-1}}{q^*} \right). \end{aligned}$$

By comparing it to the maximum Tsallis entropy policy [Lee et al., 2020, Eq.(49)] we see the only difference lies in the baseline term  $\mu(a|s)^{-(q^*-1)}$ , which is expected since we are exploiting Tsallis KL regularization. Let us define the normalization function as

$$\psi \left( \frac{Q^*(s, \cdot)}{q^*} \right) = \frac{V^*(s) + 1 - \sum_a \pi(a|s) \left( \frac{\pi(a|s)}{\mu(a|s)} \right)^{q^*-1}}{q^*},$$

537 then we can write the policy as

$$\pi^*(a|s) = \mu(a|s) \exp_{q^*} \left( \frac{Q^*(s, a)}{q^*} - \psi \left( \frac{Q^*(s, \cdot)}{q^*} \right) \right).$$

538 In a way similar to KL regularized policies, at  $k + 1$ -th update, take  $\pi^* = \pi_{k+1}$ ,  $\mu = \pi_k$  and  
 539  $Q^* = Q_k$ , we write  $\pi_{k+1} \propto \pi_k \exp_q Q_k$  since the normalization function does not depend on actions.  
 540 We ignored the scaling constant  $q^*$  and regularization coefficient. Hence one can now expand Tsallis  
 541 KL policies as:

$$\pi_{k+1} \propto \pi_k \exp_{q^*} (Q_k) \propto \pi_{k-1} \exp_{q^*} (Q_{k-1}) \exp_{q^*} (Q_k) \propto \cdots \propto \exp_{q^*} Q_1 \cdots \exp_{q^*} Q_k,$$

542 which proved the first part of Eq. (7).

## 543 D.2 Tsallis KL Policies Do More than Average

544 We now show the second part of Eq. (7), which stated that the Tsallis KL policies do more than  
 545 average. This follows from the following lemma:

**Lemma 2** (Eq. (25) of [Yamano, 2002]).

$$(\exp_q x_1 \cdots \exp_q x_n)^{1-q} = \exp_q \left( \sum_{j=1}^k x_j \right)^{1-q} + \sum_{j=2}^k (1-q)^j \sum_{i_1=1 < \cdots < i_j}^k x_{i_1} \cdots x_{i_j}. \quad (19)$$

546 However, the mismatch between the base  $q$  and the exponent  $1 - q$  is inconvenient. We exploit the  
 547  $q = 2 - q^*$  duality to show this property holds for  $q^*$  as well:

$$\begin{aligned} (\exp_{q^*} x \cdot \exp_{q^*} y)^{q^*-1} &= [1 + (q^* - 1)x]_+ \cdot [1 + (q^* - 1)y]_+ \\ &= [1 + (q^* - 1)x + (q^* - 1)y + (q^* - 1)^2 xy]_+ \\ &= \exp_q (x + y)^{q^*-1} + (q^* - 1)^2 xy. \end{aligned}$$

548 Now since we proved the two-point property for  $q^*$ , by the same induction steps in [Yamano, 2002,  
 549 Eq. (25)] we conclude the proof. The weighted average part Eq. (8) comes immediately from [Suyari  
 550 et al., 2020, Eq.(18)].

## 551 E Implementation Details

552 We list the hyperparameters for Gym environments in Table 1. The epsilon threshold is fixed at 0.01  
 553 from the beginning of learning. FC  $n$  refers to the fully connected layer with  $n$  activation units.

554 For the Atari games we implemented MVI( $q$ ), Tsallis-VI and M-VI based on the Quantile Regression  
 555 DQN [Dabney et al., 2018]. We leverage the optimized Stable-Baselines3 architecture [Raffin et al.,  
 556 2021] for best performance. The details can be seen from Table 2. The Q-network uses 3 convolutional  
 557 layers. The epsilon greedy threshold is initialized at 1.0 and gradually decays to 0.01 at the end of  
 558 first 10% of learning. For conservative learning, we choose the Tsallis entropy coefficient as  $\alpha = 10$ .

559 We show in Figure 6 the full learning curves of MVI( $q$ ). Figures 7 and 8 show the full learning curves  
 560 of Tsallis-VI.

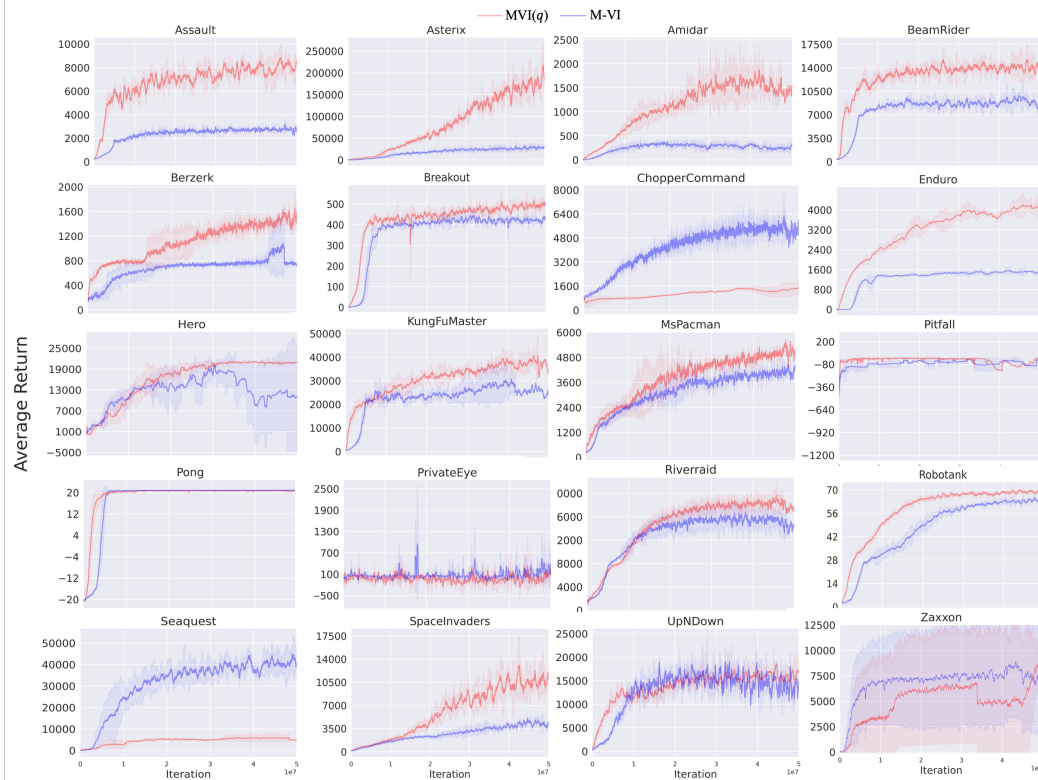

Figure 6: Learning curves of  $MVI(q)$  and  $M-VI$  on the selected Atari games.

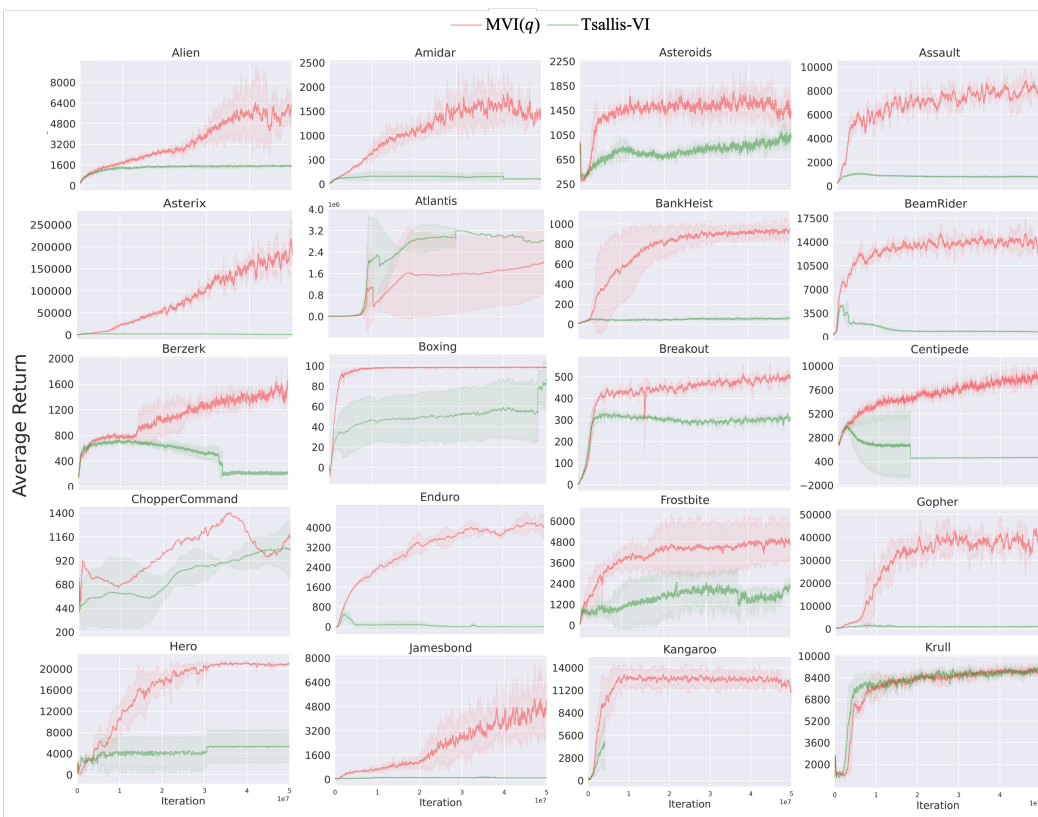

Figure 7: Learning curves of  $MVI(q)$  and  $Tsallis-VI$  on the selected Atari games.



Table 1: Parameters used for CartPole-v1.

| Network Parameter        | Value                      | Algorithm Parameter                   | Value |
|--------------------------|----------------------------|---------------------------------------|-------|
| $T$ (total steps)        | $5 \times 10^5$            | $\gamma$ (discount rate)              | 0.99  |
| $C$ (interaction period) | 4                          | $\epsilon$ (epsilon greedy threshold) | 0.01  |
| $ B $ (buffer size)      | $5 \times 10^4$            | $\tau$ (Tsallis entropy coefficient)  | 0.03  |
| $B_t$ (batch size)       | 128                        | $\alpha$ (advantage coefficient)      | 0.9   |
| $I$ (update period)      | 100 (Car.) / 2500 (Others) |                                       |       |
| Q-network architecture   | FC512 - FC512              |                                       |       |
| activation units         | ReLU                       |                                       |       |
| optimizer                | Adam                       |                                       |       |
| optimizer learning rate  | $10^{-3}$                  |                                       |       |

Table 2: Parameters used for Atari games.

| Network Parameter        | Value                                                                                 | Algorithmic Parameter                                | Value                          |
|--------------------------|---------------------------------------------------------------------------------------|------------------------------------------------------|--------------------------------|
| $T$ (total steps)        | $5 \times 10^7$                                                                       | $\gamma$ (discount rate)                             | 0.99                           |
| $C$ (interaction period) | 4                                                                                     | $\tau_{MVI(q)}$ (MVI( $q$ ) entropy coefficient)     | 10                             |
| $ B $ (buffer size)      | $1 \times 10^6$                                                                       | $\alpha_{MVI(q)}$ (MVI( $q$ ) advantage coefficient) | 0.9                            |
| $B_t$ (batch size)       | 32                                                                                    | $\tau_{Tsallis}$ (Tsallis-VI entropy coef.)          | 10                             |
| $I$ (update period)      | 8000                                                                                  | $\alpha_{M-VI}$ (M-VI advantage coefficient)         | 0.9                            |
| activation units         | ReLU                                                                                  | $\tau_{M-VI}$ (M-VI entropy coefficient)             | 0.03                           |
| optimizer                | Adam                                                                                  | $\epsilon$ (epsilon greedy threshold)                | $1.0 \rightarrow 0.01 _{10\%}$ |
| optimizer learning rate  | $10^{-4}$                                                                             |                                                      |                                |
| Q-network architecture   | Conv <sub>8,8</sub> 32 - Conv <sub>4,4</sub> 64 - Conv <sub>3,3</sub> 64 - FC512 - FC |                                                      |                                |

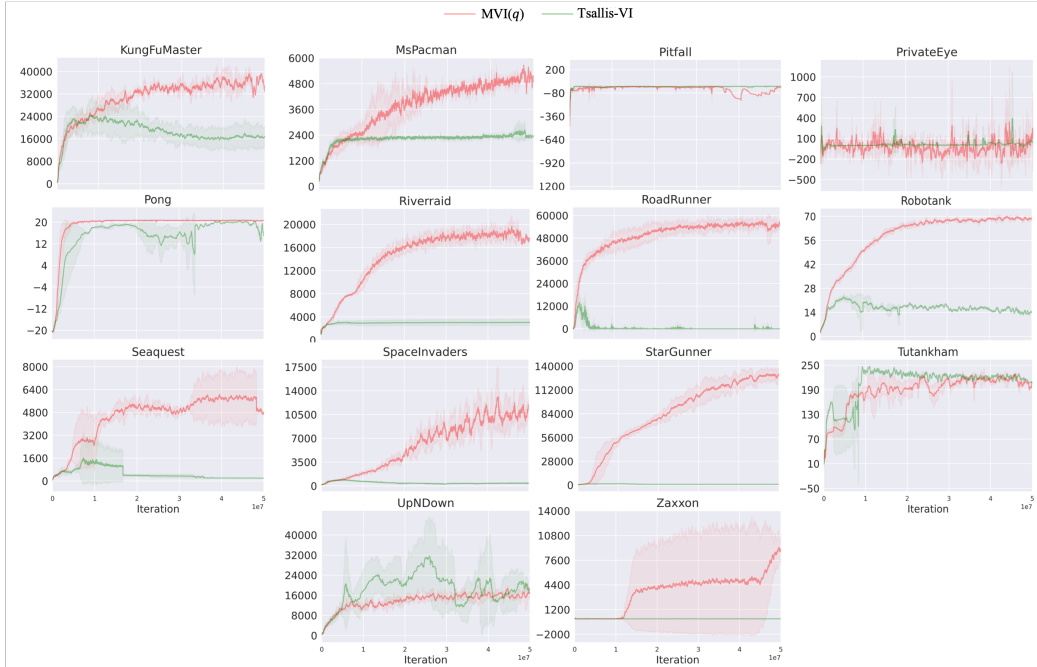Figure 8: (cont'd) MVI( $q$ ) and Tsallis-VI on the selected Atari games.
